# Supplementary material
Source: PubMed Central journal article supplement (PMC3963562)
Supplement: supp_tpc.113.121194_tpc121194_SupplementalData.pdf [file supp_tpc.113.121194_tpc121194_SupplementalData.pdf]

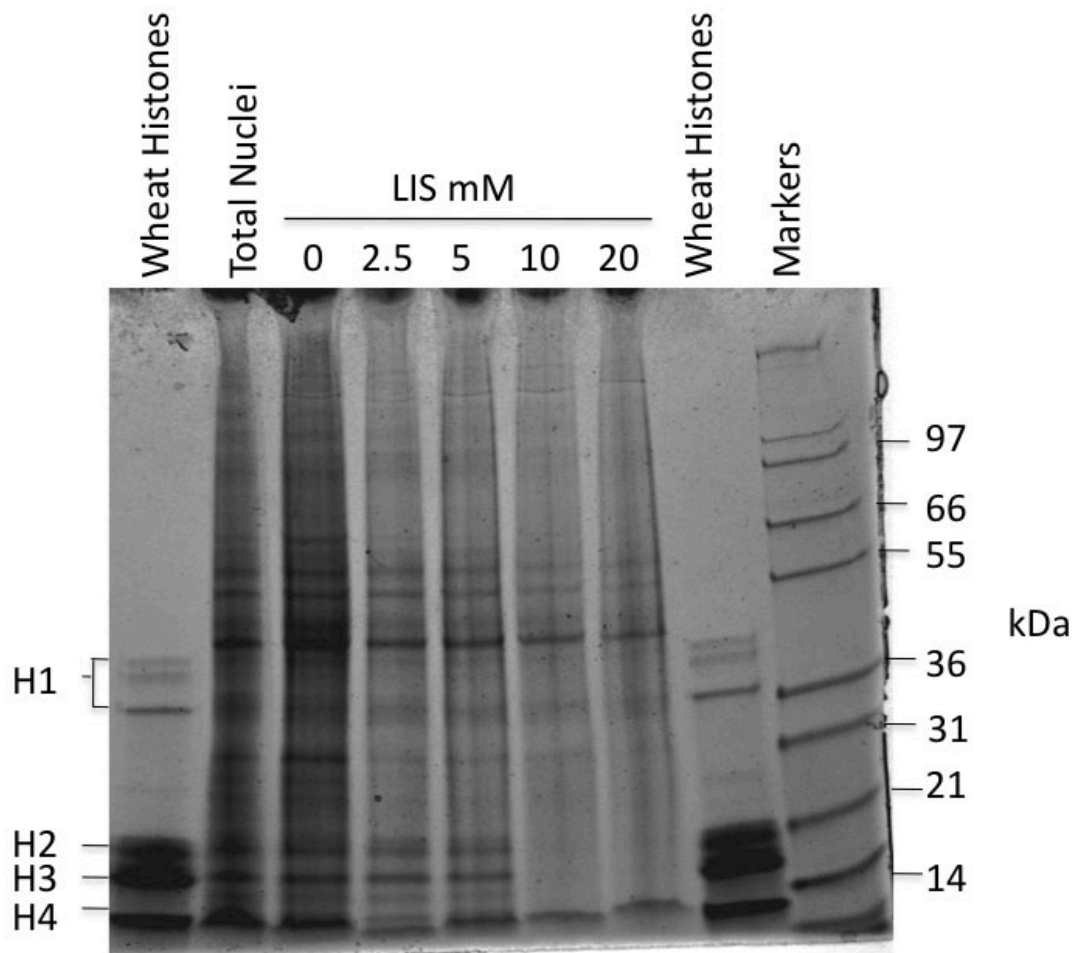

**Supplemental Figure 1: Histone removal from Arabidopsis nuclei.** A Coomassie-stained SDS/polyacrylamide gel of proteins remaining after extracting nuclei with the LIS-containing buffer HIB2. LIS concentration (mM) is indicated above the each lane. From left to right: Lane 1, purified wheat histones; Lane 2, total nuclear proteins; Lanes 3 to 7, nuclear proteins after treatment with increasing LIS concentrations; Lane 8; purified wheat histones; Lane 9, molecular mass markers. Locations of wheat and Arabidopsis histones are indicated on the left, and masses (kDa) of the markers are shown on the right.

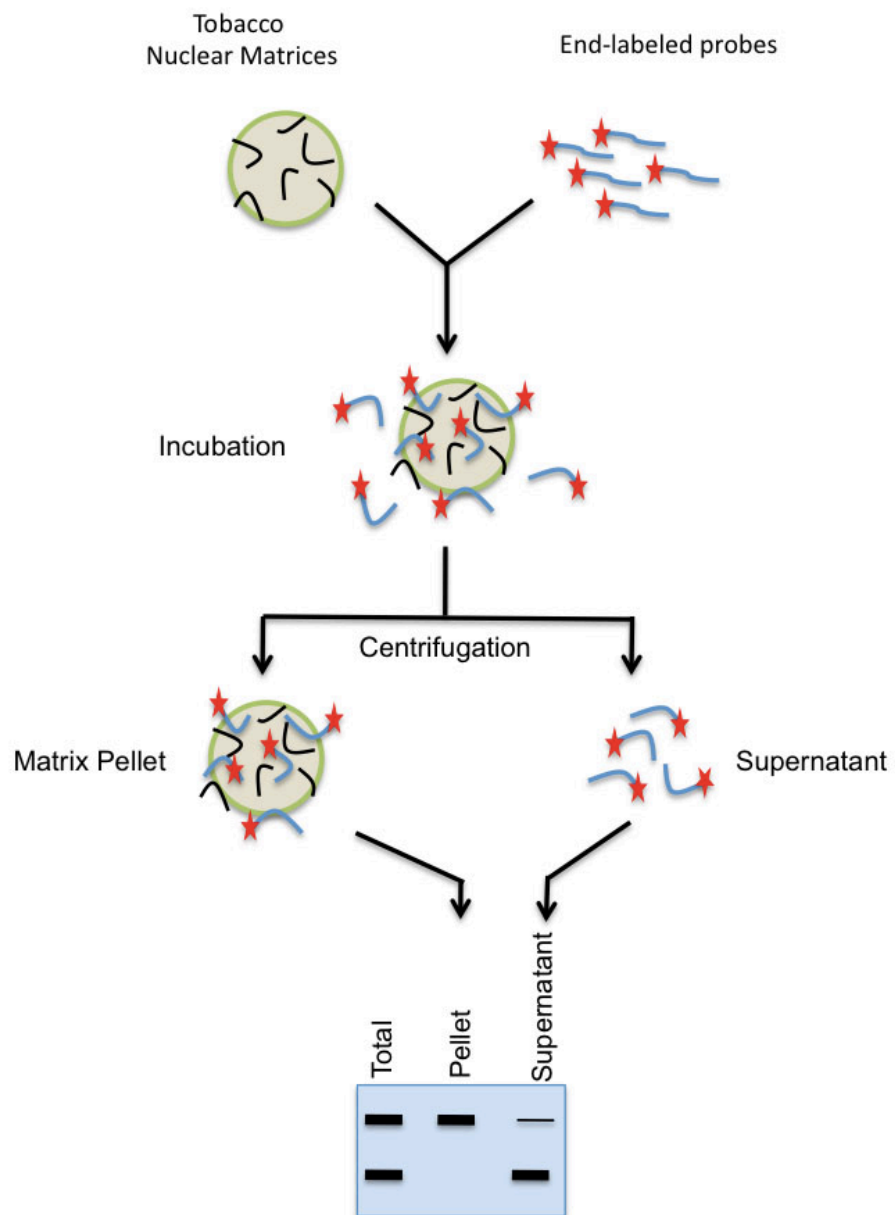

**Supplemental Figure 2: In vitro binding assay steps.** The binding of a particular DNA fragment was tested by incubation of end-labeled exogenous fragment with nuclear matrices. Details are described within the Methods.

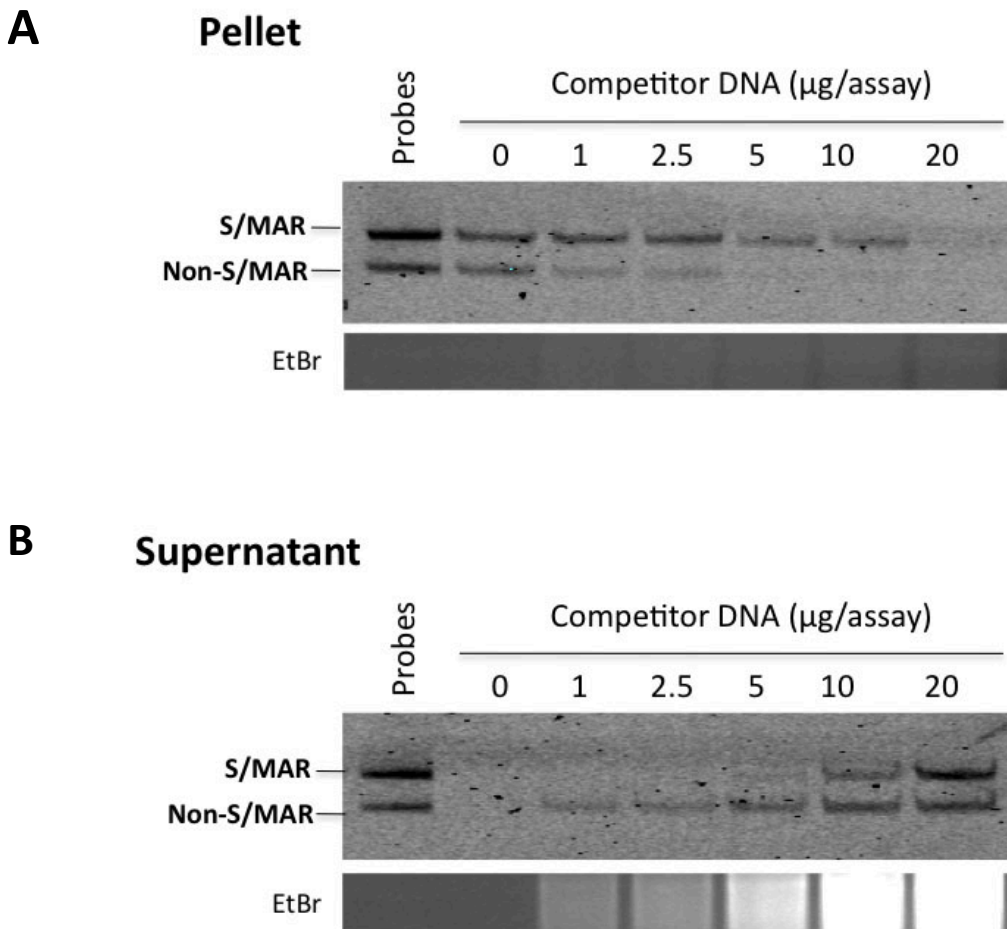

**Supplemental Figure 3: Matrix binding competition between S/MARs and *E. coli* DNA.** The total assay volume was 50  $\mu\text{L}$  and contained  $\sim 6 \times 10^4$  NT-1 nuclear matrices. The non-S/MAR DNA served as an internal negative control. The total DNA stained with ethidium bromide (EtBr) is shown below each binding assay for both the pellet and the supernatant fractions. **(A)** Pellet lanes show the labeled S/MAR or non-S/MAR DNA bound to the nuclear matrix in the presence of 0, 1, 2.5, 5, 10, or 20  $\mu\text{g}$  of sonicated *E. coli* competitor DNA. Binding of S/MAR and non-S/MAR DNA are similar in the absence of competitor DNA, but only the S/MAR binds to the matrix in the presence of high concentrations of competitor DNA. **(B)** Supernatant lanes show the labeled S/MAR or non-S/MAR DNA that did not bind to the nuclear matrix in the presence of 0, 1, 2.5, 5, 10, or 20  $\mu\text{g}$  of *E. coli* competitor DNA. The S/MAR DNA does not appear in the supernatant until high concentrations of competitor DNA are added.

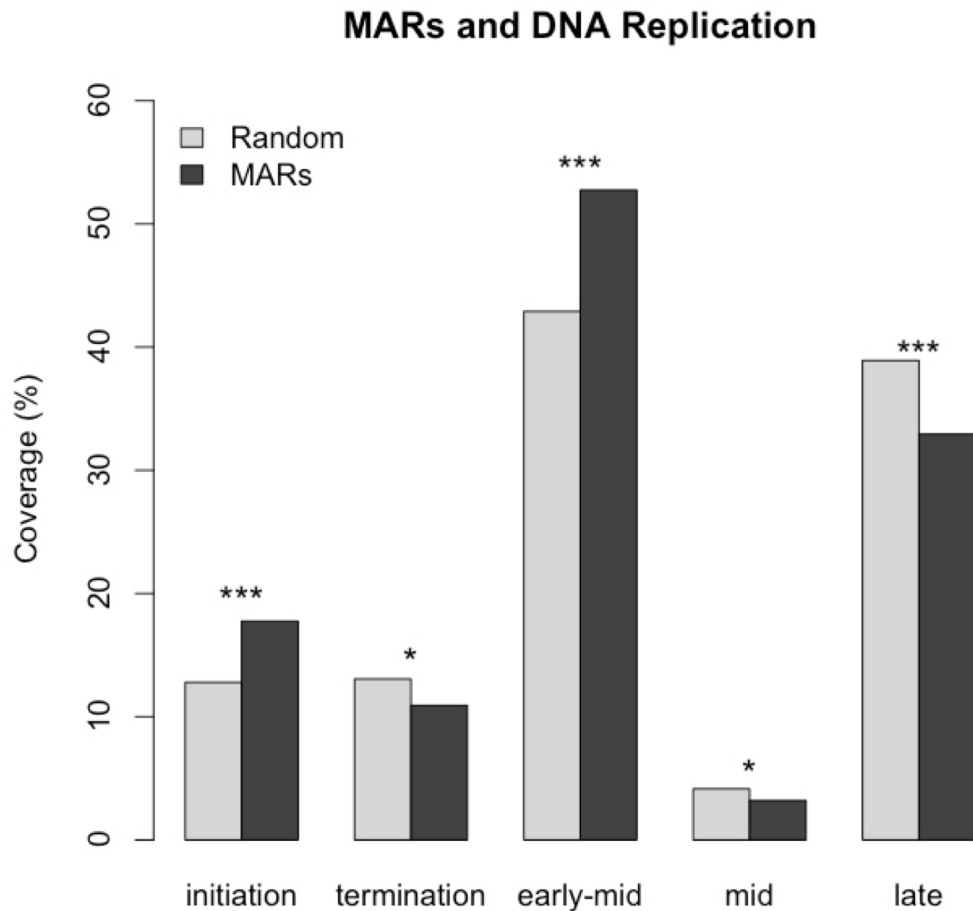

**Supplemental Figure 4: Modest S/MARs enrichment in DNA replication initiation zones and early replicating regions.** Determination of the intersection of S/MARs with putative DNA replication initiation and termination zones and segments of DNA replicating at three times in S phase, early-mid, mid only or late only. For comparison, 100,000 random samples of the same size distribution of the S/MARs were generated. S/MARs are modestly enriched in initiation zones and segments of early-mid replication, and depleted in termination zones, and segments of mid-only and late-only replication. P value significance codes \*\*\*  $p \leq 0.001$ , \*  $p \leq 0.05$  based on permutation tests.

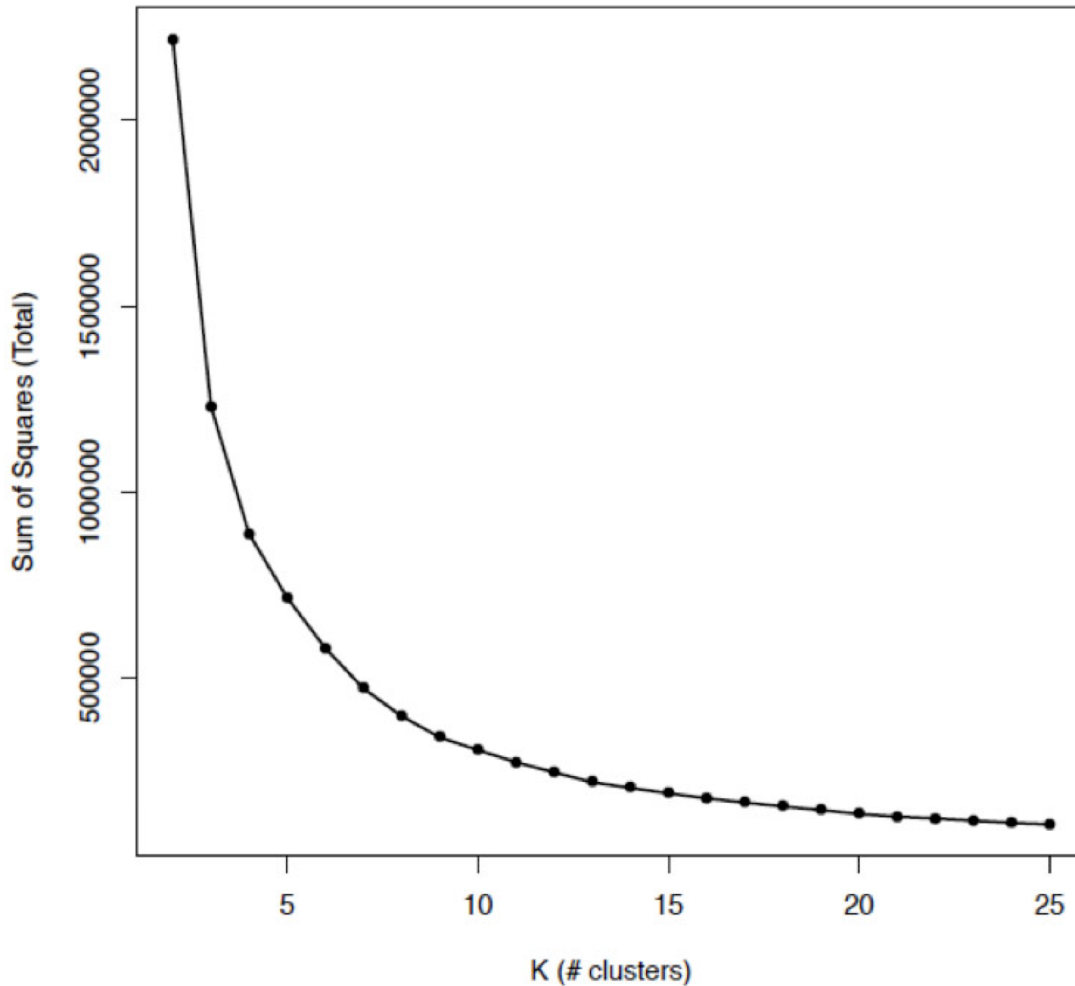

**Supplemental Figure 5: Selection of K for K-means clustering of S/MAR data.** K-means clustering was used on the gene, exon and TE content to cluster our S/MARs into putative functional groups for further analysis. To determine a reasonable number of clusters,  $k = 2$  to  $k = 25$  was scanned.  $K = 5$  was selected because the reduction in the sum of squares of the residuals began to plateau at this point, and the resulting clusters at  $k = 5$  seemed biologically relevant, i.e. unannotated, TE-associated, flanking genes, exonic, and intronic.

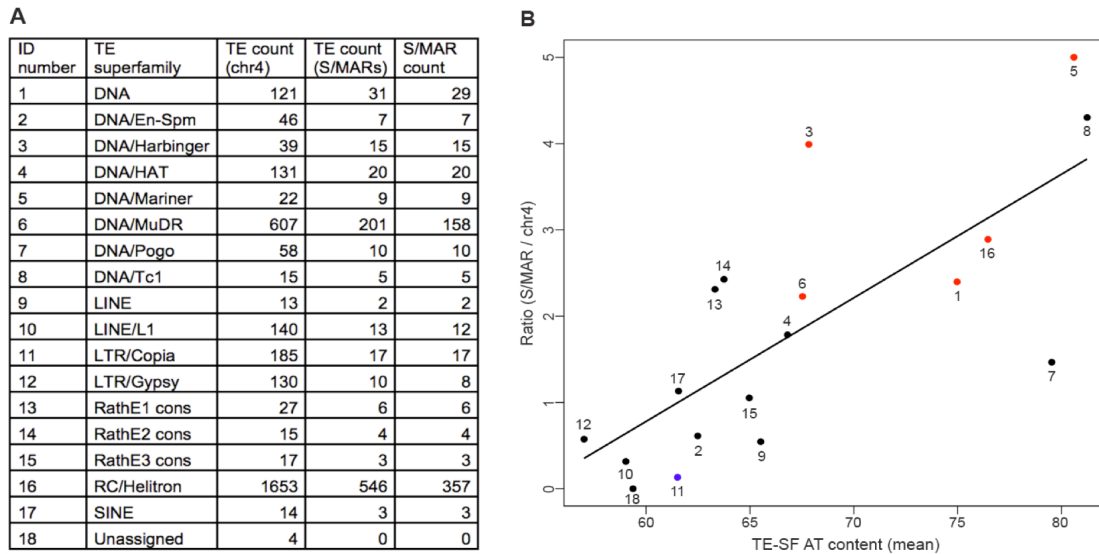

**Supplemental Figure 6: Relationship between TE-SF AT content and enrichment of TE-SF in S/MARs.** (A) The overlap of the various annotated TE-SFs with S/MARs was determined. Shown are the total numbers of each TE-SF for chr4, the number of TE-SF in S/MARs, and the number of S/MARs that overlap with each TE-SF. (B) The sequence coverage of each of the 18 annotated TE-SFs for chr4 and for the S/MAR was determined. As a measure of enrichment in S/MARs, the ratio of coverage in S/MARs to coverage in chr4 was calculated. The mean AT content for each TE-SF was also determined. A simple linear model was used to determine the correlation between AT content and S/MAR enrichment for each TE-SF ( $R^2 = 0.56$ ,  $p$  value = 0.0003). Statistical significance for any observed enrichment was estimated by permutation, and enriched TE-SFs are indicated in red ( $p \leq 0.01$ ), with the single depleted TE-SF indicated in blue ( $p \leq 0.01$ ).

| <b>Supplemental Table 1. Distribution and density of genes, TEs and S/MARs in chr4 regions.</b> |                  |                   |               |                   |                   |                     |                 |                   |                    |                      |                       |
|-------------------------------------------------------------------------------------------------|------------------|-------------------|---------------|-------------------|-------------------|---------------------|-----------------|-------------------|--------------------|----------------------|-----------------------|
| <b>Region</b>                                                                                   | <b>Low Coord</b> | <b>High Coord</b> | <b>Length</b> | <b>AT content</b> | <b>Gene Count</b> | <b>Gene Density</b> | <b>TE Count</b> | <b>TE Density</b> | <b>S/MAR Count</b> | <b>S/MAR Density</b> | <b>S/MAR distance</b> |
|                                                                                                 |                  |                   |               | (%)               |                   | (count/Mb)          |                 | (count/Mb)        |                    | (count/Mb)           | (kb)                  |
| Distal Short                                                                                    | 1                | 1592652           | 1592652       | 63.85             | 452               | 284                 | 404             | 254               | 141                | 89                   | 11.2                  |
| Proximal Short                                                                                  | 2310328          | 2811478           | 501151        | 65.55             | 124               | 247                 | 260             | 519               | 42                 | 84                   | 11.9                  |
| Proximal Long                                                                                   | 5266604          | 9200060           | 3933457       | 65.35             | 1020              | 259                 | 1559            | 396               | 325                | 83                   | 12                    |
| Distal Long                                                                                     | 9200061          | 18585056          | 9384996       | 63.66             | 2748              | 293                 | 1013            | 108               | 850                | 91                   | 11                    |
| Combined                                                                                        | NA               | NA                | 15412256      | 64.17             | 4344              | 282                 | 3236            | 210               | 1358               | 88                   | 11.4                  |

| Supplemental Table 2. Comparison of mapped and pS/MARs. |     |                |      |               |      |      |      |      |
|---------------------------------------------------------|-----|----------------|------|---------------|------|------|------|------|
|                                                         |     | mapped S/MAR   |      |               |      |      |      |      |
|                                                         |     | 0              | 1    |               |      |      |      |      |
| pS/MAR                                                  | 0   | -              | 498  |               |      |      |      |      |
|                                                         | 1   | 2032           | 860  | 29.7          |      |      |      |      |
|                                                         |     |                |      | 63.3          |      |      |      |      |
|                                                         |     |                |      | S/MAR Cluster |      |      |      |      |
|                                                         |     | Not Identified |      | A             | B    | C    | D    | E    |
| predicted                                               | NO  | 498            | 0    | 114           | 15   | 117  | 181  | 71   |
|                                                         | YES | 860            | 2032 | 310           | 261  | 168  | 50   | 71   |
|                                                         |     | %              | 63.3 | 73.1          | 94.6 | 58.9 | 21.6 | 50.0 |



| <b>Supplemental Table 3. Summary of k-means clustering results</b> |             |             |           |              |                 |                       |                    |               |                   |
|--------------------------------------------------------------------|-------------|-------------|-----------|--------------|-----------------|-----------------------|--------------------|---------------|-------------------|
| <b>Cluster</b>                                                     | <b>Gene</b> | <b>Exon</b> | <b>TE</b> | <b>Count</b> | <b>WithinSS</b> | <b>WithinSS/Count</b> | <b>Unannotated</b> | <b>Intron</b> | <b>AT_percent</b> |
| A                                                                  | 3.24        | 2.93        | 7.38      | 424          | 105326.46       | 248.41                | 89.15              | 0.31          | 69.99             |
| B                                                                  | 5.75        | 4.77        | 80.54     | 276          | 160962.87       | 583.20                | 14.87              | 0.98          | 72.91             |
| C                                                                  | 47.67       | 36.83       | 7.12      | 285          | 158016.00       | 554.44                | 45.82              | 10.84         | 65.88             |
| D                                                                  | 89.94       | 82.21       | 4.21      | 231          | 129215.36       | 559.37                | 9.44               | 7.73          | 58.69             |
| E                                                                  | 93.78       | 28.84       | 14.21     | 142          | 162702.89       | 1145.79               | 5.11               | 64.94         | 67.12             |

| <b>Supplemental Table 4. Data for TE superfamily enrichment analysis.</b> |                    |                 |                   |                      |                   |                   |                        |              |               |                   |
|---------------------------------------------------------------------------|--------------------|-----------------|-------------------|----------------------|-------------------|-------------------|------------------------|--------------|---------------|-------------------|
| <b>TE_SF</b>                                                              | <b>TE_SF_Count</b> | <b>TE_SF_BP</b> | <b>TE_SF_Perc</b> | <b>SMAR_TE_Count</b> | <b>SMAR_Count</b> | <b>SMAR_TE_BP</b> | <b>SMAR_TE_SF_Perc</b> | <b>Ratio</b> | <b>Pvalue</b> | <b>TE_AT_Perc</b> |
| DNA                                                                       | 121                | 43528           | 0.2824            | 31                   | 29                | 8047              | 0.6771                 | 2.398        | 0.00576       | 74.97243154       |
| DNA/En-Spm                                                                | 46                 | 22365           | 0.1451            | 7                    | 7                 | 1055              | 0.08877                | 0.6118       | 1             | 62.48602727       |
| DNA/Harbinger                                                             | 39                 | 22751           | 0.1476            | 15                   | 15                | 7002              | 0.5892                 | 3.992        | 0.00108       | 67.83438091       |
| DNA/HAT                                                                   | 131                | 48968           | 0.3177            | 20                   | 20                | 6738              | 0.5669                 | 1.785        | 0.48996       | 66.8109786        |
| DNA/Mariner                                                               | 22                 | 4964            | 0.0322            | 9                    | 9                 | 1914              | 0.161                  | 5.001        | 0.00036       | 80.60032232       |
| DNA/MuDR                                                                  | 607                | 363159          | 2.356             | 201                  | 158               | 62417             | 5.252                  | 2.229        | 0             | 67.53047563       |
| DNA/Pogo                                                                  | 58                 | 22872           | 0.1484            | 10                   | 10                | 2585              | 0.2175                 | 1.466        | 1             | 79.52955579       |
| DNA/Tc1                                                                   | 15                 | 3379            | 0.02192           | 5                    | 5                 | 1121              | 0.09432                | 4.303        | 0.05904       | 81.23705238       |
| LINE?                                                                     | 13                 | 3167            | 0.02054           | 2                    | 2                 | 133               | 0.01119                | 0.5447       | 1             | 65.51941901       |
| LINE/L1                                                                   | 140                | 82568           | 0.5356            | 13                   | 12                | 2011              | 0.1692                 | 0.3159       | 0.25128       | 59.02407712       |
| LTR/Copia                                                                 | 185                | 209256          | 1.357             | 17                   | 17                | 2120              | 0.1784                 | 0.1314       | 0             | 61.51364835       |
| LTR/Gypsy                                                                 | 130                | 111791          | 0.7252            | 10                   | 8                 | 4949              | 0.4164                 | 0.5742       | 1             | 57.01174513       |
| RathE1_cons                                                               | 27                 | 3541            | 0.02297           | 6                    | 6                 | 631               | 0.05309                | 2.311        | 1             | 63.31544761       |
| RathE2_cons                                                               | 15                 | 2287            | 0.01484           | 4                    | 4                 | 428               | 0.03601                | 2.427        | 1             | 63.7516397        |
| RathE3_cons                                                               | 17                 | 2452            | 0.01591           | 3                    | 3                 | 199               | 0.01674                | 1.053        | 1             | 64.96737357       |
| RC/Helitron                                                               | 1653               | 873336          | 5.665             | 546                  | 357               | 194615            | 16.38                  | 2.89         | 0             | 76.46035027       |
| SINE                                                                      | 14                 | 4631            | 0.03004           | 3                    | 3                 | 404               | 0.03399                | 1.132        | 1             | 61.56337724       |
| Unassigned                                                                | 4                  | 6879            | 0.04462           | 0                    | 0                 | 0                 | 0                      | 0            | 1             | 59.36909435       |

| <b>Supplemental Table 5. Binomial tests of gene activity.</b> |                |           |              |               |            |                    |                    |             |
|---------------------------------------------------------------|----------------|-----------|--------------|---------------|------------|--------------------|--------------------|-------------|
| <b>TSS-associated Genes</b>                                   |                |           |              |               |            |                    |                    |             |
|                                                               | <b>Cluster</b> | <b>on</b> | <b>total</b> | <b>pvalue</b> | <b>est</b> | <b>confint_low</b> | <b>confint_hig</b> | <b>null</b> |
|                                                               | A              | 112       | 239          | 0.01334174    | 0.4686192  | 0.4040002          | 0.5340262          | 0.5498975   |
|                                                               | B              | 58        | 145          | 0.00031245    | 0.4        | 0.3196149          | 0.484558           | 0.5498975   |
|                                                               | C              | 167       | 243          | 1.4119E-05    | 0.6872428  | 0.624864           | 0.7449846          | 0.5498975   |
|                                                               | D              | 83        | 137          | 0.1984159     | 0.6058394  | 0.5187991          | 0.6882005          | 0.5498975   |
|                                                               | E              | 57        | 99           | 0.615439      | 0.5757576  | 0.4723362          | 0.6745238          | 0.5498975   |
| <b>TTS-associated genes</b>                                   |                |           |              |               |            |                    |                    |             |
|                                                               | <b>Cluster</b> | <b>on</b> | <b>total</b> | <b>pvalue</b> | <b>est</b> | <b>confint_low</b> | <b>confint_hig</b> | <b>null</b> |
|                                                               | A              | 69        | 124          | 0.9281978     | 0.5564516  | 0.4645328          | 0.6456112          | 0.5498975   |
|                                                               | B              | 32        | 66           | 0.3227705     | 0.4848485  | 0.3599108          | 0.6111897          | 0.5498975   |
|                                                               | C              | 35        | 72           | 0.2882447     | 0.4861111  | 0.3665003          | 0.6069             | 0.5498975   |
|                                                               | D              | 47        | 74           | 0.1609528     | 0.6351351  | 0.5150697          | 0.7440246          | 0.5498975   |
|                                                               | E              | 9         | 21           | 0.2805597     | 0.4285714  | 0.2181969          | 0.6597937          | 0.5498975   |
| <b>TFs and Non-TFs</b>                                        |                |           |              |               |            |                    |                    |             |
|                                                               | <b>Cluster</b> | <b>on</b> | <b>total</b> | <b>pvalue</b> | <b>est</b> | <b>confint_low</b> | <b>confint_hig</b> | <b>null</b> |
| <b>TFs</b>                                                    | A              | 12        | 35           | 0.60593449    | 0.3428571  | 0.1913241          | 0.52211            | 0.3956044   |
|                                                               | B              | 2         | 8            | 0.49158875    | 0.25       | 0.031854           | 0.6508558          | 0.3956044   |
|                                                               | C              | 12        | 19           | 0.05730479    | 0.6315789  | 0.3835779          | 0.8371141          | 0.3956044   |
|                                                               | D              | 3         | 11           | 0.54366332    | 0.2727273  | 0.0602177          | 0.6097426          | 0.3956044   |
|                                                               | E              | 4         | 8            | 0.72037381    | 0.5        | 0.1570128          | 0.8429872          | 0.3956044   |
| <b>Non-TFs</b>                                                | A              | 9         | 13           | 0.75261848    | 0.6923077  | 0.3857383          | 0.9090796          | 0.739726    |
|                                                               | B              | 6         | 9            | 0.70443005    | 0.6666667  | 0.2992951          | 0.9251454          | 0.739726    |
|                                                               | C              | 13        | 18           | 0.79372956    | 0.7222222  | 0.465198           | 0.9030508          | 0.739726    |
|                                                               | D              | 8         | 12           | 0.52341314    | 0.6666667  | 0.3488755          | 0.9007539          | 0.739726    |
|                                                               | E              | 5         | 6            | 1             | 0.8333333  | 0.3587654          | 0.9957893          | 0.739726    |

| <b>Supplemental Table 6. NDR content of S/MARs.</b> |                  |          |          |          |          |          |          |          |                         |                         |
|-----------------------------------------------------|------------------|----------|----------|----------|----------|----------|----------|----------|-------------------------|-------------------------|
|                                                     | <b>NDR Count</b> |          |          |          |          |          |          |          | <b>NDR Positive (%)</b> | <b>NDR Coverage (%)</b> |
| <b>S/MAR Cluster</b>                                | <b>0</b>         | <b>1</b> | <b>2</b> | <b>3</b> | <b>4</b> | <b>5</b> | <b>6</b> | <b>7</b> |                         |                         |
| <b>A</b>                                            | 8                | 144      | 186      | 62       | 12       | 9        | 2        | 1        | 98.1                    | 65.1                    |
| <b>B</b>                                            | 4                | 81       | 104      | 56       | 20       | 9        | 0        | 2        | 98.6                    | 67.5                    |
| <b>C</b>                                            | 11               | 101      | 115      | 40       | 12       | 5        | 0        | 1        | 96.1                    | 53.7                    |
| <b>D</b>                                            | 75               | 106      | 36       | 12       | 2        | 0        | 0        | 0        | 67.5                    | 30.2                    |
| <b>E</b>                                            | 7                | 56       | 51       | 26       | 2        | 0        | 0        | 0        | 95.1                    | 53.9                    |

| <b>Supplemental Table 7. Comparison of S/MAR-positive and S/MAR-negative NDRs.</b>                                                                                                                                                                                                                                                                                                    |               |               |          |             |                |
|---------------------------------------------------------------------------------------------------------------------------------------------------------------------------------------------------------------------------------------------------------------------------------------------------------------------------------------------------------------------------------------|---------------|---------------|----------|-------------|----------------|
|                                                                                                                                                                                                                                                                                                                                                                                       | <b>S/MAR+</b> | <b>S/MAR-</b> | <b>t</b> | <b>d.f.</b> | <b>p value</b> |
| N                                                                                                                                                                                                                                                                                                                                                                                     | 2407          | 12677         | -        | -           | -              |
| Length                                                                                                                                                                                                                                                                                                                                                                                | 278           | 283           | -1.23    | 3015.2      | 0.2181         |
| AT content                                                                                                                                                                                                                                                                                                                                                                            | 70.92         | 68.41         | 18.31    | 3225.4      | < 2.2E-16      |
| AT content (enrichment)                                                                                                                                                                                                                                                                                                                                                               | 10.53         | 6.61          | 18.31    | 3225.4      | < 2.2E-16      |
| Poly(dA:dT) content                                                                                                                                                                                                                                                                                                                                                                   | 18.0          | 13.18         | 27.8     | 2929.6      | < 2.2E-16      |
| Poly(dA:dT) content (enrichment)                                                                                                                                                                                                                                                                                                                                                      | 85.8          | 36.4          | 27.8     | 2929.6      | < 2.2E-16      |
| <p>Welch Two-Sample T-test used for comparisons</p> <p>Poly(dA:dT) Content determined using tracts of 4 bp or longer and allowing no mismatches.</p> <p>Enrichment for AT and Poly(dA:dT) content was calculated to make direct comparisons easier.</p> <p>This enrichment was calculated relative to the means for chr4, 64.1% for AT content and 9.66% for poly(dA:dT) content.</p> |               |               |          |             |                |
